# Supplementary material for: Fibrous Hydrogels for Cell Encapsulation: A Modular and Supramolecular Approach
Source: PubMed Central journal article supplement (PMC4880210; doi:10.1371/journal.pone.0155625), 2016-05-25
Supplement: pone.0155625.s004.pdf [file pone.0155625.s004.pdf]

#### The derivation of equation 4.

To calculate the void size between two parallel fibers, a homogeneous cubic arrangement of fibers is assumed, as depicted below:

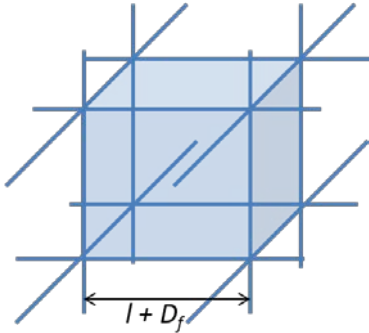

In which  $l$  is the linear void size between two parallel fibers and  $D_f$  the effective fiber thickness. The volume,  $V$ , of one cubic unit will therefore be:  $V = (l + D_f)^3$

In addition, we assume a square fiber cross-section as depicted in the next schematic:

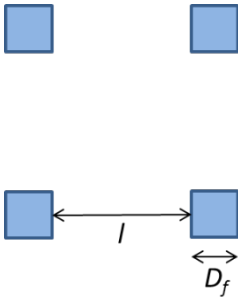

The fiber cross-sectional surface,  $A_f$ , is therefore:  $A_f = D_f^2$

The volume of a fiber at one of the edges of the cubic unit is:  $(l + D_f)A_f$

One cubic unit contains 12 of these fiber edges. Each edge is shared by 4 cubic units, so  $\frac{1}{4}$  of each fiber contributes to the volume that is occupied by fiber within one cubic unit:

$$3(l + D_f)A_f$$

In addition, in this model, at each corner three fibers overlap, which should be corrected for. Therefore the volume within one cubic unit that is occupied by fiber,  $V_f$ , is:

$$V_f = 3(l + D_f)A_f - 2D_f^3$$

From a previous study it is known that the protein density,  $\rho$ , in the fibers is 1.7 mmol/l. Therefore the number of protein molecules present within one cubic unit is:

$$\rho V_f = \rho(3(l + D_f)A_f - 2D_f^3)$$

Finally, the volume of one cubic unit,  $V$ , is equal to the number of protein molecules per cubic unit divided by the protein concentration,  $c$  (in mmol/l).

$$V = \rho V_f / c$$

$$\rho(3(l + D_f)A_f - 2D_f^3)/c = (l + D_f)^3$$

This is equivalent to equation 4.
